# TABLE OF CONTENTS

# ANESTHESIOLOGY

Volume 135  
Issue 4  
October 2021

|                                                  |     |
|--------------------------------------------------|-----|
| ◇ This Month in ANESTHESIOLOGY .....             | A1  |
| Science, Medicine, and the Anesthesiologist..... | A19 |
| Infographics in Anesthesiology .....             | A23 |

## ◆ Editorial

|                                                                                                                                                                                   |     |
|-----------------------------------------------------------------------------------------------------------------------------------------------------------------------------------|-----|
| ANESTHESIOLOGY: Reflecting and Leading<br><i>E. D. Kharasch</i> .....                                                                                                             | 551 |
| John W. Severinghaus, M.D., 1922 to 2021<br><i>P. E. Bickler, T. Hornbein, L. J. Saidman</i> .....                                                                                | 555 |
| Quantitative Twitch Monitoring: What Works Best and How Do We Know?<br><i>A. Bowdle, K. Michaelson</i> .....                                                                      | 558 |
| Augmenting the Anesthesiologist's Cockpit with Head-mounted Displays for Image-guided Procedures: Are We There Yet?<br><i>M. H. Franzen, G. Krishnamurthy, J. A. Gálvez</i> ..... | 562 |
| Normal Saline for Kidney Transplantation Surgery: Less Is More<br><i>D. N. Wijesundera, S. A. McCluskey</i> .....                                                                 | 564 |
| Anesthesia Mechanisms: A Patchwork Quilt rather than a Wet Blanket?<br><i>L. Voss, J. W. Sleight</i> .....                                                                        | 568 |
| Coagulation Management after Trauma in the Presence of Direct Oral Anticoagulants<br><i>D. R. Spahn, A. Kaserer, J.-D. Studt</i> .....                                            | 570 |
| Reassessing the Role for Sympathetic Neurolysis in Patients with Pancreatic Cancer<br><i>J. P. Rathmell, E. M. Rickerson, J. A. Tulskey, K. D. Lillemoe</i> .....                 | 573 |

## Special Announcement

|                                                                                                                                                                                                     |     |
|-----------------------------------------------------------------------------------------------------------------------------------------------------------------------------------------------------|-----|
| Journal-related Activities and Other Special Activities at the 2021 American Society of Anesthesiologists Meeting<br><i>M. J. Avram, D. J. Culley, E. D. Kharasch, J. H. Levy, M. J. London</i> ... | 576 |
| George A. Mashour, M.D., Ph.D., Recipient of the 2021 Excellence in Research Award<br><i>K. K. Tremper</i> .....                                                                                    | 585 |
| Alex Proekt, M.D., Ph.D., Recipient of the 2021 James E. Cottrell, M.D., Presidential Scholar Award<br><i>M. B. Kelz, D. J. Culley</i> .....                                                        | 587 |

## Special Article

|                                                                                                             |     |
|-------------------------------------------------------------------------------------------------------------|-----|
| Takuo Aoyagi, Ph.D., American Society of Anesthesiologists Honorary Member<br><i>A. A. Hannenberg</i> ..... | 591 |
|-------------------------------------------------------------------------------------------------------------|-----|

## Perioperative Medicine

### CLINICAL SCIENCE

|                                                                                                                                                                                                                                                             |     |
|-------------------------------------------------------------------------------------------------------------------------------------------------------------------------------------------------------------------------------------------------------------|-----|
| ◆ ◇ Ipsilateral and Simultaneous Comparison of Responses from Acceleromyography- and Electromyography-based Neuromuscular Monitors<br><i>R. Nemes, S. Lengyel, G. Nagy, D. R. Hampton, M. Gray, J. R. Renew, E. Tassonyi, B. Fülesdi, S. J. Brull</i> ..... | 597 |
|-------------------------------------------------------------------------------------------------------------------------------------------------------------------------------------------------------------------------------------------------------------|-----|

Contractions and muscle action potentials from the same adductor pollicis muscle were measured simultaneously by acceleromyography- and electromyography-based neuromuscular monitors, respectively, in 48 patients undergoing surgery requiring muscle relaxation. The electromyography-based device is a better indicator of adequate recovery from neuromuscular blockade and readiness for safe tracheal extubation

◇ Refers to This Month in ANESTHESIOLOGY  
◆ Refers to Editorial  
🔊 This article has an Audio Podcast

🌐 See Supplemental Digital Content  
📺 CME Article  
🎬 This article has a Video Abstract

🔍 Readers' Toolbox  
👁️ This article has a Visual Abstract  
🔓 OPEN This article is Open Access

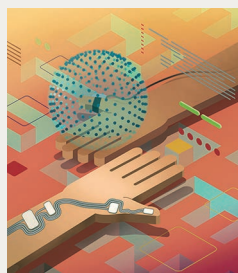

**ON THE COVER:** The paucity of easy-to-use, reliable objective neuromuscular monitors is an obstacle to universal adoption of routine neuromuscular monitoring. Electromyography (EMG) has been proposed as the optimal neuromuscular monitoring technology since it addresses several acceleromyography limitations. In this issue of ANESTHESIOLOGY, Nemes *et al.* compared simultaneous neuromuscular responses recorded from induction of neuromuscular block until recovery using the acceleromyography-based and EMG-based monitors. In an accompanying editorial, Bowdle and Michaelson discuss the limitations of both monitoring techniques and the need for further validation of currently commercially available EMG-based monitors. Cover Illustration: A. Johnson, Vivo Visuals.

- Nemes *et al.*: Ipsilateral and Simultaneous Comparison of Responses from Acceleromyography- and Electromyography-based Neuromuscular Monitors, p. 597
- Bowdle and Michaelson: Quantitative Twitch Monitoring: What Works Best and How Do We Know? p. 558

because normalized train-of-four ratios of 80% or more were observed earlier and more frequently with acceleromyography. *SUPPLEMENTAL DIGITAL CONTENT IS AVAILABLE IN THE TEXT*

# Smart Glasses for Radial Arterial Catheterization in Pediatric Patients: A Randomized Clinical Trial

Y.-E. Jang, S.-A. Cho, S.-H. Ji, E.-H. Kim, J.-H. Lee, H.-S. Kim, J.-T. Kim.....612

In a randomized controlled trial comparing radial artery cannulation in children, a head-mounted display, which projects the ultrasound screen in front of the operator's eye, had a greater first-attempt success rate and shorter times to cannulation compared to conventional ultrasound use.

# Perioperative Normal Saline Administration and Delayed Graft Function in Patients Undergoing Kidney Transplantation: A Retrospective Cohort Study

K. Kolodzie, O. S. Cakmakkaya, E. S. Boparai, M. Tavakol, J. R. Feiner, M.-O. Kim, T. B. Newman, C. U. Niemann.....621

In a single-center analysis of 2,515 patients undergoing kidney transplantation between 2004 and 2015, delayed graft function occurred in 21% of patients receiving greater than or equal to 80% normal saline, in 17.5% of patients receiving between 30 and 80% normal saline, and in 15.8% of patients receiving less than or equal to 30% normal saline. For patients receiving greater than or equal to 80% normal saline compared with patients receiving less than or equal to 30% normal saline, the adjusted odds ratios for delayed graft function were 1.52 (95% CI, 1.05 to 2.21;  $P = 0.028$ ) for deceased donor transplants ( $n = 1,472$ ) and 1.66 (95% CI, 0.65 to 4.25;  $P = 0.287$ ) for living donor transplants ( $n = 1,043$ ). *SUPPLEMENTAL DIGITAL CONTENT IS AVAILABLE IN THE TEXT*

## BASIC SCIENCE

# Excitation of Putative Glutamatergic Neurons in the Rat Parabrachial Nucleus Region Reduces Delta Power during Dexmedetomidine but not Ketamine Anesthesia

E. D. Melonakos, M. J. Siegmann, C. Rey, C. O'Brien, K. K. Nikolaeva, K. Solt, C. J. Nehs.....633

Chemogenetic excitation of parabrachial excitatory neurons in adult male rats reduced cortical delta power during low-dose dexmedetomidine but not during high-dose dexmedetomidine or ketamine anesthesia. Changes in cortical delta power did not correspond to changes in time to recovery from anesthesia. These observations suggest that the effectiveness of parabrachial nucleus excitation to change the neurophysiologic and behavioral effects of anesthesia depends on the molecular mechanisms of actions of general anesthetics. *SUPPLEMENTAL DIGITAL CONTENT IS AVAILABLE IN THE TEXT*

# Dose-dependent Respiratory Depression by Remifentanyl in the Rabbit Parabrachial Nucleus/Kölikker–Fuse Complex and Pre-Böttinger Complex

B. Palkovic, J. J. Callison, V. Marchenko, E. A. E. Stuth, E. J. Zuperku, A. G. Stucke.....649

The hypothesis that opioid-induced respiratory depression is due to combined depression of parabrachial nucleus/Kölikker–Fuse complex activity and pre-Böttinger complex activity was tested in a decerebrate, hyperoxic, and moderately hypercapnic rabbit preparation at steady-state intravenous remifentanyl infusions that depressed the respiratory rate by 50% and after a remifentanyl bolus that produced apnea. Sequential naloxone microinjection into the bilateral Kölikker–Fuse nucleus, parabrachial nucleus, and pre-Böttinger complex did not completely reverse respiratory depression produced by the steady-state remifentanyl concentrations and reversed respiratory depression from apneic remifentanyl doses even less effectively. This suggests that opioids depress respiratory drive to the parabrachial nucleus/Kölikker–Fuse complex and pre-Böttinger complex and that depression of drive reduced the activity of these areas, especially at high opioid concentrations.

## Critical Care Medicine

### BASIC SCIENCE

# Reversing Rivaroxaban Anticoagulation as Part of a Multimodal Hemostatic Intervention in a Polytrauma Animal Model

F. Rayatdoost, T. Braunschweig, B. Maron, H. Schöchl, N. Akman, R. Rossaint, E. Herzog, S. Heitmeier, O. Grottko.....673

In an animal model of rivaroxaban-treated pigs that underwent complex traumatic injury, prothrombin complex concentrates alone and in combination with tranexamic acid and fibrinogen concentrate effectively reduced blood loss, restored hemostasis, and improved thrombin generation. *SUPPLEMENTAL DIGITAL CONTENT IS AVAILABLE IN THE TEXT*

## Pain Medicine

### CLINICAL SCIENCE

# Neurolytic Splanchnic Nerve Block and Pain Relief, Survival, and Quality of Life in Unresectable Pancreatic Cancer: A Randomized Controlled Trial

D. Dong, M. Zhao, J. Zhang, M. Huang, Y. Wang, L. Qi, C.-f. Wan, X. Yu, T. Song.....686

A multicenter study was designed in which patients with unresectable pancreatic cancer and moderate to severe pain were randomized to lytic splanchnic nerve block or block using saline. All patients received opioids according to a set protocol. Pain relief was superior for those receiving lytic blocks for 3 months, and opioid use was lower for 5 months. Quality of life was not affected, however. *SUPPLEMENTAL DIGITAL CONTENT IS AVAILABLE IN THE TEXT*

# Anesthesia Method, Tourniquet Use, and Persistent Postsurgical Pain after Total Knee Arthroplasty: A Prespecified Secondary Analysis of a Randomized Trial

R. A. Palanne, M. T. Rantasalo, A. P. Vakkuri, R. Madanat, K. T. Oikola, E. M. Reponen, R. Linko, T. J. Vahlberg, N. K. A. Skants.....699

In a secondary analysis of a study involving 404 patients, no clinically important differences in pain scores 1 yr after arthroplasty were found

between the spinal and general anesthesia groups. In the same study, no clinically meaningful differences in 1-yr pain scores were found between the no-tourniquet and tourniquet use groups. *SUPPLEMENTAL DIGITAL CONTENT IS AVAILABLE IN THE TEXT*

## Persistent Incisional Pain after Noncardiac Surgery: An International Prospective Cohort Study

J. S. Khan, D. I. Sessler, M. T. V. Chan, C. Y. Wang, I. Garutti, W. Szczeklik, A. Turan, J. W. Busse, D. N. Buckley, J. Paul, M. McGillion, C. Fernández-Riveira, S. K. Srinathan, H. Shanthanna, I. Gilron, M. Jacka, P. Jackson, J. Hankinson, P. Paniagua, S. Pettit, P. J. Devereaux .....711

Incisional pain persisting for up to 1 yr after major noncardiac surgery was assessed prospectively in a cohort of more than 14,000 patients. Persistent incisional pain was identified in 3.3% of the patients, with nearly half reporting moderate to severe pain. Several risk factors, including female sex, history of chronic pain, coronary heart disease, and others, were identified.

## Education

### CLASSIC PAPERS REVISITED

#### Scientific Accuracy Matters

C. P. Larson, Jr .....724

### IMAGES IN ANESTHESIOLOGY

#### Extensive Fluid Extravasation after Arthroscopic Shoulder Surgery

V. G. Nicola, K. J. Chin, P. G. McHardy .....728

*SUPPLEMENTAL DIGITAL CONTENT IS AVAILABLE IN THE TEXT*

### CLINICAL FOCUS REVIEW

#### A Roadmap for Environmental Sustainability of Plastic Use in Anesthesia and the Perioperative Arena

M. Z. X. Xiao, S. A. A. Abbass, L. Bahrey, E. Rubinstein, V. W. S. Chan .....729

The authors provide an overview of the common plastics generated in the perioperative setting and outline practical recommendations that can help achieve a circular economy and lessen the impact of plastic waste on the environment.

#### Anticoagulation Monitoring for Perioperative Physicians

C. L. Maier, R. M. Sniecinski .....738

From preoperative medications to intraoperative needs to postoperative thromboprophylaxis, anticoagulants are encountered throughout the perioperative period. This review focuses on coagulation testing clinicians utilize to monitor the effects of these medications.

## MIND TO MIND

### Vial Cap Eye

J. B. McKillen .....749

## CORRESPONDENCE

### Opioid-free Anesthesia: Comment

P. Forget, J. Mulier, P. Lavand'homme, L. De Baerdemaeker, P. Pelosi, H. D. de Boer .....751

### Opioid-free Anesthesia: Comment

J. Ingrande, J. C. Drummond .....753

### Opioid-free Anesthesia: Comment

M. R. Fettiplace, M. Gitman .....755

### Opioid-free Anesthesia: Comment

J. E. Chelly .....756

### Opioid-free Anesthesia: Reply

H. Beloeil, M. Esvan, B. Laviolle .....757

### Opioid-free Anesthesia: Reply

H. Shanthanna, K. S. Ladha, H. Kehlet, G. P. Joshi .....758

### Opioid-free Anesthesia: Reply

E. D. Kharasch, J. D. Clark .....759

### Perioperative Stroke: Comment

G. A. Korbon .....760

### Perioperative Stroke: Comment

D. J. Cullen .....761

### Liposomal Bupivacaine to Treat Postoperative Pain: Comment

A. V. Wells, R. Lippell, R. Y. Weinberg, T. R. Tedore, M. Akerman .....762

### Personal Protective Equipment: Comment

R. E. Johnstone .....763

### Personal Protective Equipment: Reply

K. J. Ruskin, A. C. Musselman, J. R. Harvey, T. E. Nesthus, M. O'Connor .....764

### Clinical Use of Lactate Measurements: Comment

H. J. Woehlick, B. T. Boettcher, R. P. Dorantes .....765

### Clinical Use of Lactate Measurements: Comment

H. Bahlmann, P. Werner-Moller .....766

**Clinical Use of Lactate Measurements: Reply**

*R. M. Pino, J. Singh*.....766

**Anesthetics and Postoperative Cognition: Comment**

*C. D. Lacomis, G. C. Williamson, S. M. McHugh*.....767

**Anesthetics and Postoperative Cognition: Reply**

*Y. Li, H. Li, Z. Zuo* .....768

**Avatar Models and Radar Plots: The Future of Intraoperative Anesthesia Monitoring**

*B. Rosero-Britton, S. Amaya*.....770

**Reviews of Educational Material ..... 772**

**Anesthesiology Reflections from the Wood Library-Museum**

**From Paralytic Poison to Medicinal Marvel: Curare Advances Anesthesia**

*Jane S. Moon and Melissa L. Coleman*.....611

**Beyond Woodbridge and Tovell: Connecting the Dots to Anesthetic Safety!**

*Melissa L. Coleman and Jane S. Moon*.....620

**Sharing the Limelight of History: Paul Wood at Morton's Ether Demonstration?**

*Melissa L. Coleman and Jane S. Moon*.....632

**Luck, Pluck, and the Making of the Macintosh Laryngoscope**

*Jane S. Moon and Melissa L. Coleman*.....710

**Robert-Houdin's "Ethereal Suspension" and the Birth of Theatrical Magic**

*Jane S. Moon and Melissa L. Coleman*.....737

**Careers & Events ..... A25**

**INSTRUCTIONS FOR AUTHORS**

The most recently updated version of the Instructions for Authors is available at [www.anesthesiology.org](http://www.anesthesiology.org). Please refer to the Instructions for the preparation of any material for submission to ANESTHESIOLOGY.

Manuscripts submitted for consideration for publication must be submitted in electronic format via Editorial Manager (<https://www.editorialmanager.com/aln>). Detailed directions for submission and the most recent version of the Instructions for Authors can be found on the Journal's Web site (<http://www.anesthesiology.org>). Books and educational materials for review should be sent to Alan Jay Schwartz, M.D., M.S.Ed., Director of Education, Department of Anesthesiology and Critical Care Medicine, The Children's Hospital of Philadelphia,

34th Street and Civic Center Blvd., Room 9327, Philadelphia, Pennsylvania 19104-4399. Article-specific permission requests are managed with Copyright Clearance Center's Rightslink service. Information can be accessed directly from articles on the journal Web site. More information is available at <http://anesthesiology.pubs.asahq.org/public/rightsandpermissions.aspx>. For questions about the Rightslink service, e-mail [customer-care@copyright.com](mailto:customer-care@copyright.com) or call 877-622-5543 (U.S. only) or 978-777-9929. Advertising and related correspondence should be addressed to Advertising Manager, ANESTHESIOLOGY, Wolters Kluwer Health, Inc., Two Commerce Square, 2001 Market Street, Philadelphia, Pennsylvania 19103 (Web site: <http://www.wkccenter.com/>). Publication of an advertisement in ANESTHESIOLOGY does not constitute endorsement by the Society or Wolters Kluwer Health, Inc. of the product or service described therein or of any representations made by the advertiser with respect to the product or service.

**ANESTHESIOLOGY** (ISSN 0003-3022) is published monthly by Wolters Kluwer Health, Inc., 1800 Dual Highway, Suite 201, Hagerstown, MD 21740-6636. Business office: Two Commerce Square, 2001 Market Street, Philadelphia, PA 19103. Periodicals postage paid at Hagerstown, MD, and at additional mailing offices. Copyright © 2021, the American Society of Anesthesiologists. All Rights Reserved.

**Annual Subscription Rates:** *United States*—\$1077 Individual, \$2671 Institution, \$434 In-training. *Rest of World*—\$1136 Individual, \$2965 Institution, \$434 In-training. Single copy rate \$266. Subscriptions outside of North America must add \$58 for airfreight delivery. Add state sales tax, where applicable. The GST tax of 7% must be added to all orders shipped to Canada (Wolters Kluwer Health, Inc.'s GST Identification #895524239, Publications Mail Agreement #1119672). Indicate in-training status and name of institution. Institution rates apply to libraries, hospitals, corporations, and partnerships of three or more individuals. Subscription prices outside the United States must be prepaid. Prices subject to change without notice. Subscriptions will begin with currently available issue unless otherwise requested. Visit us online at [www.lww.com](http://www.lww.com).

Individual and in-training subscription rates include print and access to the online version. Online-only subscriptions for individuals (\$356) and persons in training (\$356) are available to nonmembers and may be ordered by downloading a copy of the Online Subscription FAXback Form from the Web site, completing the information requested, and faxing the completed form to 301-223-2400. Institutional rates are for print only; online subscriptions are available via Ovid. Institutions can choose to purchase a print and online subscription together for a discounted rate. Institutions that wish to purchase a print subscription, please contact Wolters Kluwer Health,

Inc., 1800 Dual Highway, Suite 201, Hagerstown, MD 21740-6636; phone: 800-638-3030; fax: 301-223-2400. Institutions that wish to purchase an online subscription or online with print, please contact the Ovid Regional Sales Office near you or visit [www.ovid.com/site/index.jsp](http://www.ovid.com/site/index.jsp) and select Contact and Locations.

**Address for non-member subscription information, orders, or change of address:** Wolters Kluwer Health, Inc., 1800 Dual Highway, Suite 201, Hagerstown, MD 21740-6636; phone: 800-638-3030; fax: 301-223-2400.

**Address for member subscription information, orders, or change of address:** Members of the American Society of Anesthesiologists receive the print and online journal with their membership. To become a member or provide a change of address, please contact the American Society of Anesthesiologists, 1061 American Lane, Schaumburg, Illinois 60173-4973; phone: 847-825-5586; fax: 847-825-1692; e-mail: [membership@ASAhq.org](mailto:membership@ASAhq.org). For all other membership inquiries, contact Wolters Kluwer Health, Inc., Customer Service Department, P.O. Box 1610, Hagerstown, MD 21740; phone: 800-638-3030; fax: 301-223-2400.

**Postmaster:** Send address changes to ANESTHESIOLOGY, P.O. BOX 1610, Hagerstown, MD 21740.

**Advertising:** Please contact Hilary Druker, National Account Manager, Health Learning, Research & Practice, Medical Journals, Wolters Kluwer Health, Inc.; phone: 609-304-9187; e-mail: [Hilary.Druker@wolterskluwer.com](mailto:Hilary.Druker@wolterskluwer.com). For classified advertising: Dave Wiegand, Recruitment Advertising Representative, Wolters Kluwer Health, Inc.; phone: 847-361-6128; e-mail: [Dave.Wiegand@wolterskluwer.com](mailto:Dave.Wiegand@wolterskluwer.com).
